# Supplementary material
Source: publisher figshare collection journal article supplement (https://geolsoc.figshare.com/ndownloader/files/5420972)
Supplement: Supplementary file 1 [file 5420972]

Table 3. Plagioclase Feldspar Compositions
Sample	AR05	AR05	AR05	AR05	AR05	AR05	AR05	AR05	AR05	AR05	AR05	AR05	AR05	AR05	AR05	AR05	CS02A	CS02A	CS02A	CS02A	CS02A	CS02A	CS02A	CS02A	CS02A	CS02A	CS02A	CS02A	CS02A	FQ08	FQ08	FQ08	FQ08	FQ08	FQ08	FQ08	FQ08	FQ08	FQ08	FQ08	FQ08	FQ08	FQ08	FQ08	FQ08	FQ08	FQ08	FQ08	FQ08
Mineral	plag 2	plag 2	plag 4	plag 4	plag 11	plag 11	plag 14a	plag 14a	plag 14b	plag 14b	plag 1	plag 5	plag 7	plag 16a	plag 16a	plag 16b	plag 3	plag 3	plag 11a	plag 11a	plag 22	plag 22	plag 4c	plag 4d	plag 4d	plag 8	plag 26	plag 27	plag 28	plag 2a	plag 2a	plag 10a	plag 10a	plag 12a	plag 12a	plag 13b	plag 13b	Plag15	plag 15	plag 17c	plag 17c	plag 17d	plag 17d	plag 8b	plag 8b	plag 14b	plag 1c	plag 7	plag 13
Type	pheno rim	pheno core	pheno rim	pheno core	pheno rim	pheno core	glom rim	glom core	glom rim	glom core	incl cpx	matrix	matrix	matrix rim	matrix core	matrix	pheno rim	pheno core	pheno rim	pheno core	pheno rim	pheno core	glom	glom rim	glom core	glom	matrix	matrix	matrix	pheno rim	pheno core	pheno rim	pheno core	pheno rim	pheno core	pheno rim	pheno core	glom rim	glom core	glom rim	glom core	glom rim	glom core	pheno rim	pheno core	incl cpx	matrix	matrix	matrix
wt % oxides
SiO2	52.65	48.29	53.92	53.77	53.11	52.79	59.06	57.67	56.57	53.97	53.01	64.09	51.73	67.07	52.87	55.74	53.70	53.49	53.24	54.94	53.63	54.10	53.53	56.43	53.29	52.52	58.09	57.52	58.50	55.71	47.71	53.38	53.29	54.12	49.24	54.10	49.04	53.17	53.78	53.53	54.47	53.80	54.22	52.86	52.07	52.61	52.99	58.54	63.24
Al2O3	29.36	32.73	29.41	28.63	29.42	29.94	26.28	26.89	27.40	29.29	29.76	21.49	28.60	18.89	29.78	27.81	28.37	28.93	29.02	28.02	29.41	29.15	29.41	27.74	29.67	30.01	26.43	26.49	25.62	27.91	32.02	28.74	29.51	29.54	32.92	29.57	32.62	28.94	29.82	29.73	29.07	29.51	29.07	29.45	29.84	30.32	29.00	26.05	23.24
FeO*	0.53	0.58	0.71	0.55	0.77	0.82	0.87	0.72	0.61	0.73	0.78	0.71	2.30	0.49	0.69	0.72	0.86	0.65	0.73	0.59	0.70	0.68	0.73	0.91	0.70	0.72	1.09	1.12	1.00	0.63	0.61	1.59	0.71	0.61	0.59	0.59	0.63	1.00	0.83	0.82	0.52	0.87	0.88	0.78	0.76	0.68	1.11	0.56	0.86
CaO	12.47	15.91	11.83	11.69	12.47	12.67	8.08	8.93	9.93	12.17	12.61	3.30	12.14	0.54	12.71	10.61	11.69	12.43	12.55	11.33	12.12	11.85	12.36	10.35	12.40	13.15	9.01	8.92	8.66	10.30	16.17	11.50	11.64	12.40	15.77	12.27	16.14	12.05	12.40	12.78	11.98	12.47	12.04	11.79	12.22	12.79	12.10	8.52	4.84
Na2O	3.96	2.07	4.15	4.38	3.97	3.76	6.04	5.69	5.22	4.19	3.98	6.99	3.60	5.88	3.81	4.98	4.19	3.99	3.95	4.45	4.05	4.38	4.00	5.10	4.05	3.69	5.77	5.73	5.73	5.19	2.04	4.22	4.24	4.13	2.30	4.00	2.12	4.20	4.23	3.81	4.33	3.89	4.48	4.28	3.99	3.88	4.17	6.00	6.78
K2O	0.22	0.08	0.25	0.25	0.00	0.19	0.54	0.49	0.42	0.22	0.22	2.96	0.21	6.77	0.22	0.34	0.28	0.21	0.24	0.26	0.25	0.27	0.22	0.34	0.20	0.21	0.46	0.49	0.55	0.32	0.05	0.23	0.25	0.26	0.08	0.23	0.06	0.23	0.22	0.17	0.23	0.21	0.25	0.18	0.17	0.20	0.24	0.55	2.39
Total	99.19	99.66	100.26	99.28	99.73	100.17	100.87	100.40	100.15	100.56	100.35	99.54	98.57	99.64	100.08	100.20	99.09	99.70	99.73	99.58	100.17	100.43	100.23	100.86	100.30	100.31	100.84	100.26	100.06	100.06	98.60	99.66	99.65	101.06	100.89	100.76	100.61	99.60	101.27	100.84	100.59	100.75	100.95	99.34	99.04	100.48	99.62	100.22	101.36
Cation proportion; formula based on 32 oxygens
Si	9.628	8.880	9.733	9.802	9.652	9.569	10.491	10.317	10.166	9.727	9.595	11.464	9.597	12.021	9.590	10.039	9.817	9.726	9.691	9.960	9.701	9.758	9.682	10.093	9.638	9.522	10.365	10.328	10.498	10.041	8.884	9.736	9.684	9.706	8.935	9.718	8.934	9.697	9.642	9.634	9.796	9.685	9.749	9.648	9.543	9.513	9.672	10.469	11.147
Al	6.327	7.093	6.257	6.151	6.302	6.396	5.501	5.669	5.804	6.220	6.348	4.524	6.241	3.990	6.367	5.904	6.112	6.200	6.225	5.986	6.270	6.195	6.271	5.847	6.323	6.413	5.557	5.605	5.419	5.928	7.025	6.177	6.321	6.244	7.040	6.261	7.002	6.221	6.301	6.307	6.160	6.260	6.159	6.335	6.447	6.461	6.236	5.495	4.826
Fe(ii)	0.081	0.089	0.106	0.084	0.117	0.124	0.129	0.108	0.092	0.110	0.118	0.107	0.366	0.074	0.105	0.108	0.132	0.099	0.110	0.089	0.105	0.103	0.110	0.136	0.105	0.108	0.162	0.168	0.150	0.095	0.095	0.243	0.108	0.091	0.089	0.088	0.096	0.153	0.124	0.123	0.078	0.131	0.132	0.120	0.116	0.102	0.170	0.083	0.126
Ca	2.444	3.134	2.288	2.284	2.427	2.460	1.537	1.711	1.912	2.350	2.445	0.629	2.406	0.104	2.470	2.049	2.290	2.422	2.447	2.200	2.349	2.291	2.395	1.984	2.402	2.554	1.722	1.717	1.666	1.990	3.226	2.246	2.266	2.382	3.065	2.363	3.150	2.353	2.381	2.464	2.309	2.406	2.320	2.306	2.400	2.478	2.366	1.634	0.913
Na	1.404	0.736	1.453	1.547	1.399	1.322	2.080	1.974	1.819	1.463	1.398	2.421	1.295	2.043	1.339	1.738	1.485	1.405	1.392	1.564	1.421	1.532	1.401	1.768	1.419	1.298	1.995	1.993	1.993	1.812	0.737	1.491	1.495	1.436	0.811	1.393	0.747	1.486	1.469	1.330	1.510	1.356	1.562	1.514	1.416	1.360	1.476	2.080	2.317
K	0.052	0.018	0.057	0.059	0.000	0.043	0.122	0.113	0.096	0.050	0.050	0.681	0.049	1.547	0.050	0.078	0.066	0.049	0.056	0.060	0.059	0.062	0.050	0.077	0.045	0.050	0.106	0.111	0.125	0.074	0.011	0.052	0.059	0.059	0.019	0.052	0.014	0.054	0.050	0.039	0.052	0.048	0.058	0.041	0.039	0.046	0.056	0.124	0.540
Total	19.936	19.951	19.894	19.926	19.896	19.915	19.860	19.892	19.889	19.919	19.955	19.825	19.954	19.779	19.921	19.916	19.902	19.901	19.921	19.859	19.904	19.941	19.908	19.906	19.933	19.945	19.907	19.922	19.852	19.939	19.978	19.946	19.932	19.919	19.959	19.874	19.945	19.963	19.967	19.897	19.905	19.887	19.981	19.963	19.961	19.960	19.976	19.885	19.868
An	62.67	80.60	60.23	58.72	63.44	64.32	41.11	45.05	49.96	60.84	62.80	16.71	64.04	2.81	63.99	53.02	59.63	62.49	62.83	57.53	61.36	58.97	62.28	51.81	62.13	65.45	45.06	44.93	44.01	51.34	81.17	59.28	59.32	61.48	78.70	62.03	80.53	60.46	61.05	64.28	59.65	63.14	58.88	59.72	62.25	63.80	60.68	42.52	24.09
Ab	36.01	18.94	38.26	39.78	36.56	34.55	55.62	51.98	47.53	37.88	35.91	64.79	34.64	55.32	34.70	44.98	38.66	36.25	35.74	40.91	37.11	39.44	36.41	46.17	36.71	33.28	52.18	52.16	52.68	46.77	18.55	39.34	39.14	37.01	20.81	36.59	19.10	38.16	37.66	34.70	39.02	35.59	39.65	39.21	36.73	35.01	37.87	54.23	61.41
Or	1.32	0.46	1.51	1.51	0.00	1.13	3.27	2.97	2.50	1.29	1.29	18.50	1.32	41.87	1.31	2.01	1.71	1.27	1.43	1.56	1.53	1.59	1.31	2.01	1.16	1.27	2.76	2.92	3.32	1.90	0.29	1.38	1.54	1.52	0.49	1.37	0.36	1.38	1.28	1.02	1.33	1.27	1.47	1.07	1.02	1.19	1.45	3.25	14.49
Note: Cat Prop = cation proportion; P = phenocryst; glom = glomerocryst; An = anorthite; Ab = albite; Or = orthoclase
[truncated: 47 more columns]
